# Supplementary material for: Assessment of Polyethylene Glycol Hydrogel Spacer and Its Effect on Rectal Radiation Dose in Prostate Cancer Patients Receiving Proton Beam Radiation Therapy
Source: PubMed Central journal article supplement — Adv Radiat Oncol. 2019 Sep 5;5(1):92–100. doi: 10.1016/j.adro.2019.08.007 (PMC7004937; doi:10.1016/j.adro.2019.08.007), 2019-09-05
Supplement: mmc1.pdf [file mmc1.pdf]

## Supplement 1 – Calculation of AUC for each individual patient

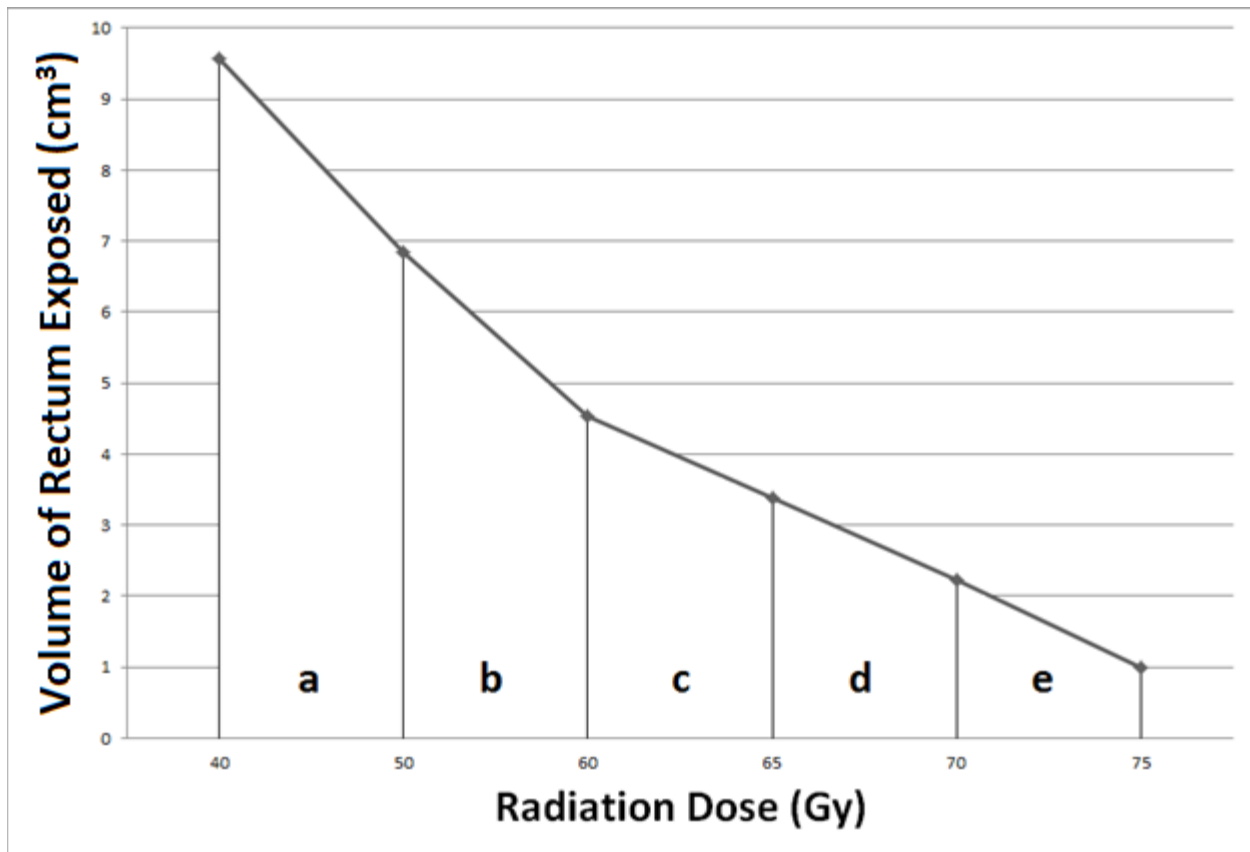

The area under the curve (AUC) measurement is calculated as the sum of areas a, b, c, d, and e for each patient.

- $[\text{Volume of rectum exposed to 40Gy (cc)} + \text{volume of rectum exposed to 50Gy (cc)}] / 2 \times (50\text{Gy} - 40\text{Gy})$
- $[\text{Volume of rectum exposed to 50Gy (cc)} + \text{volume of rectum exposed to 60Gy (cc)}] / 2 \times (60\text{Gy} - 50\text{Gy})$
- $[\text{Volume of rectum exposed to 60Gy (cc)} + \text{volume of rectum exposed to 65Gy (cc)}] / 2 \times (65\text{Gy} - 60\text{Gy})$
- $[\text{Volume of rectum exposed to 65Gy (cc)} + \text{volume of rectum exposed to 70Gy (cc)}] / 2 \times (70\text{Gy} - 65\text{Gy})$
- $[\text{Volume of rectum exposed to 70Gy (cc)} + \text{volume of rectum exposed to 75Gy (cc)}] / 2 \times (75\text{Gy} - 70\text{Gy})$
