# Supplementary material for: Assessment of Polyethylene Glycol Hydrogel Spacer and Its Effect on Rectal Radiation Dose in Prostate Cancer Patients Receiving Proton Beam Radiation Therapy
Source: PubMed Central journal article supplement — Adv Radiat Oncol. 2019 Sep 5;5(1):92–100. doi: 10.1016/j.adro.2019.08.007 (PMC7004937; doi:10.1016/j.adro.2019.08.007), 2019-09-05

**Supplement 2 – Median (IQR) Volume of Rectum (cc<sup>3</sup>) per radiation dosimetry in PEG Hydrogel vs No Hydrogel, all p<0.001**

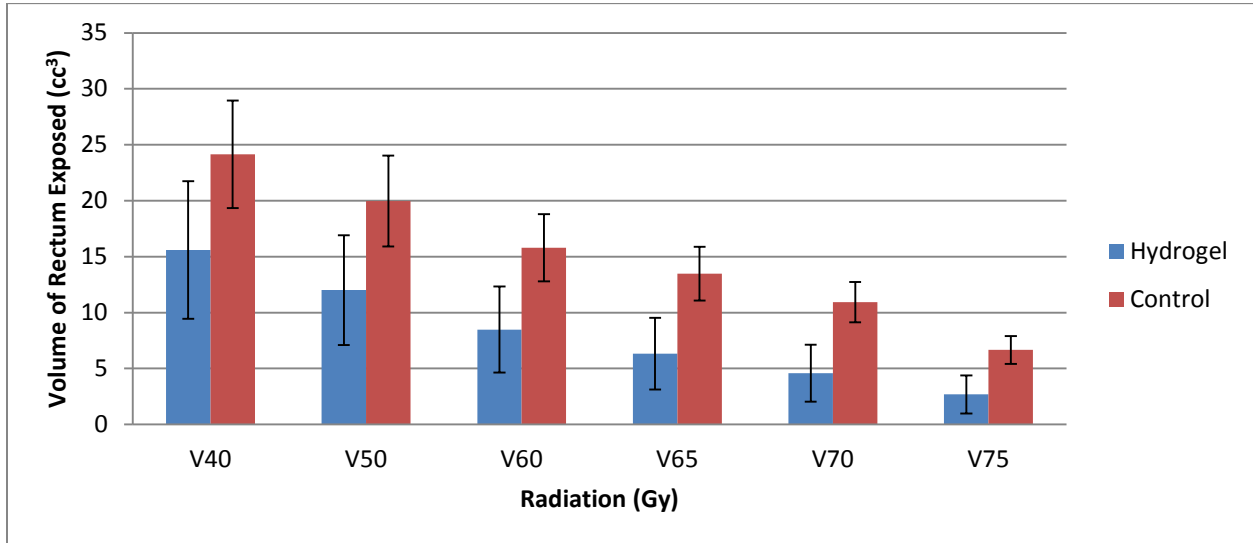

Supplement: mmc2.pdf [file mmc2.pdf]
