# Supplementary figures and images for: Assessment of Polyethylene Glycol Hydrogel Spacer and Its Effect on Rectal Radiation Dose in Prostate Cancer Patients Receiving Proton Beam Radiation Therapy
Source: PubMed Central journal article supplement — Adv Radiat Oncol. 2019 Sep 5;5(1):92–100. doi: 10.1016/j.adro.2019.08.007 (PMC7004937; doi:10.1016/j.adro.2019.08.007), 2019-09-05

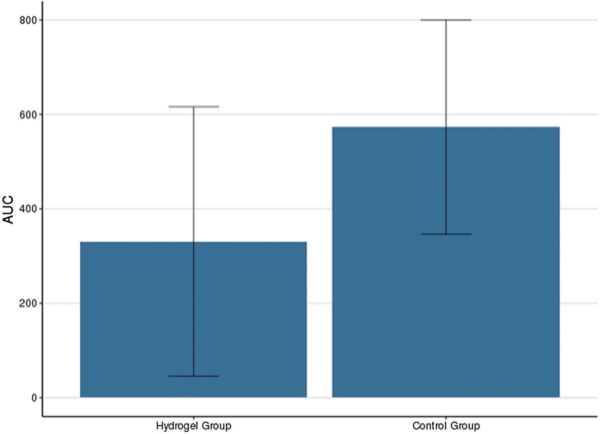

Supplement: mmc3.pdf [file mmc3.pdf]

**a**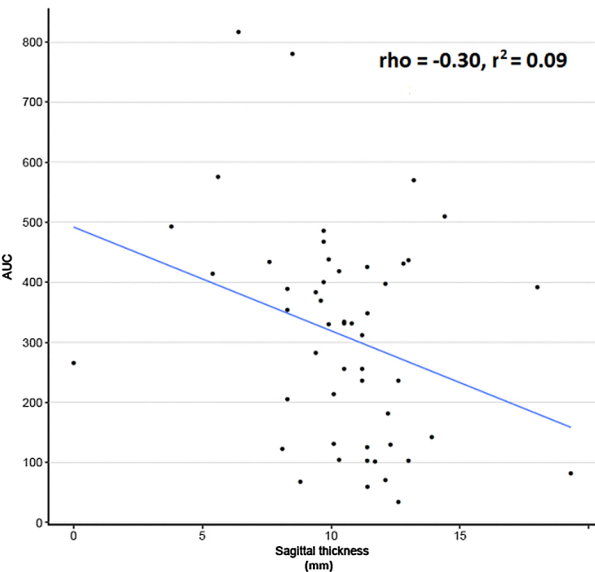**b**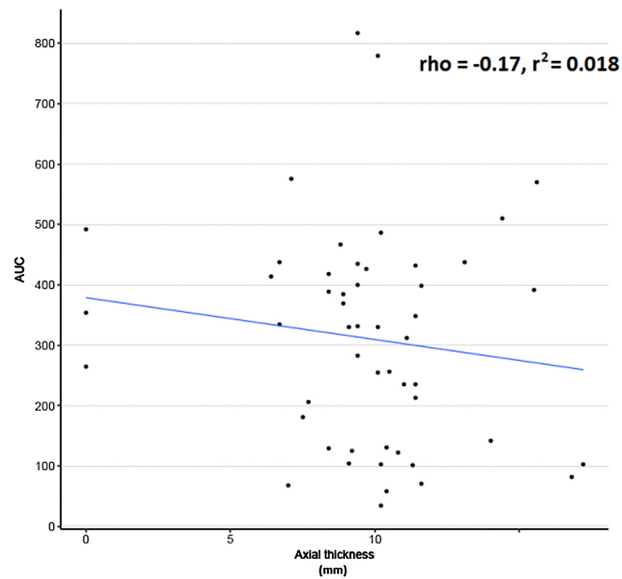**c**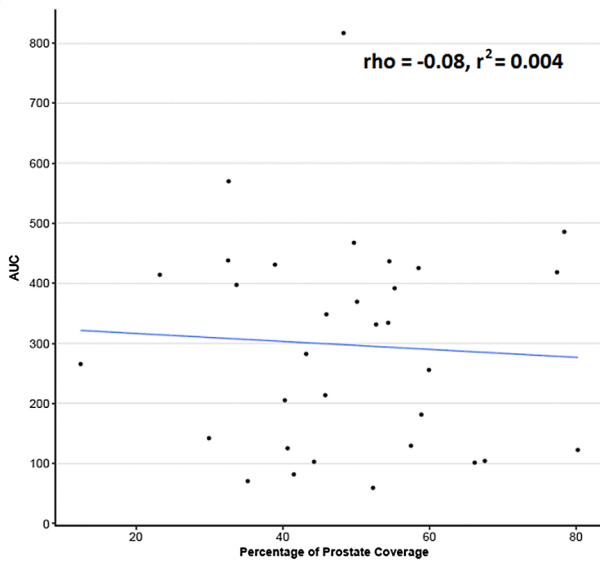

Supplement: mmc4.pdf [file mmc4.pdf]
